# Supplementary material
Source: publisher site journal article supplement (https://www.spandidos-publications.com/2886/downloadSupplementary)

Figure S1. SDS-PAGE analysis of the purified anti-ErbB2 antibodies H2-18 and Tra under non-reducing and reducing conditions. Tra, trastuzumab.

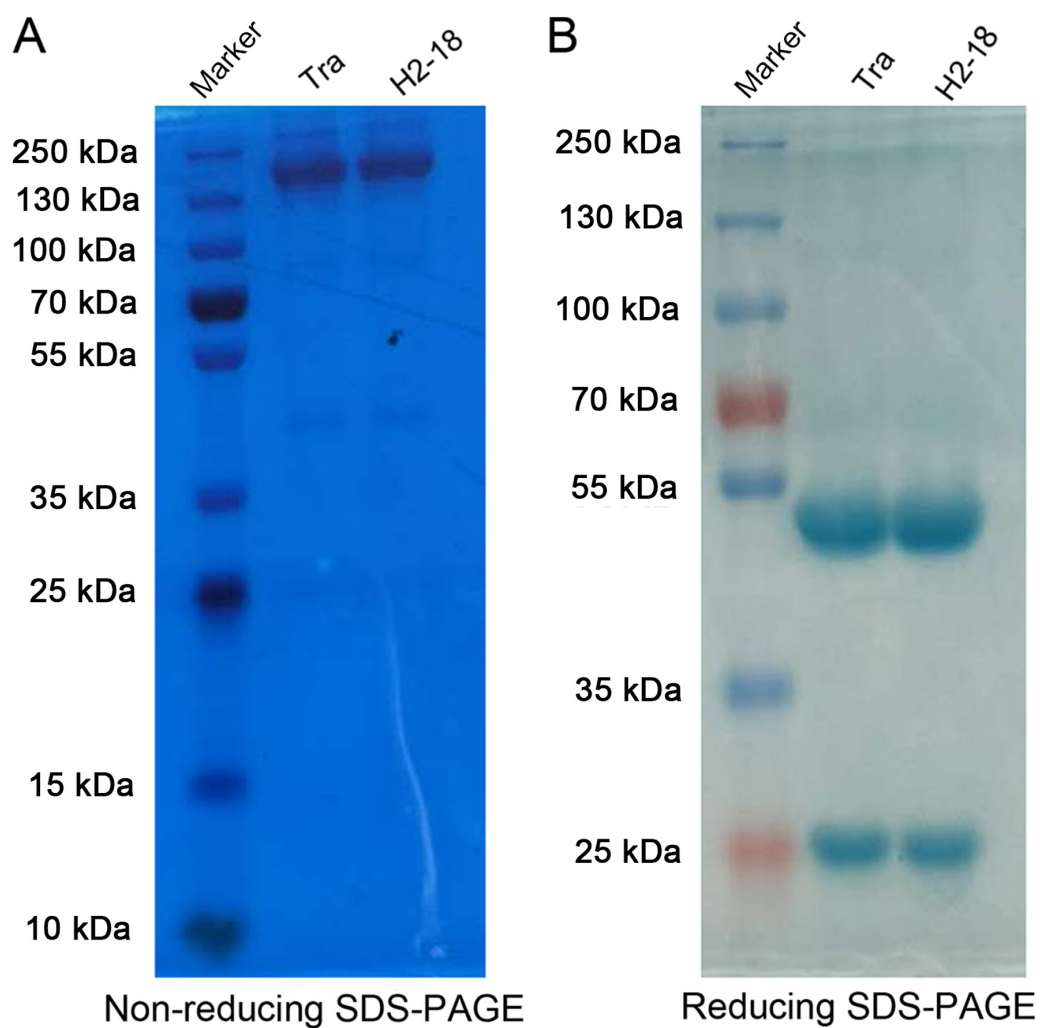

Supplement: Supplementary file 1 [file downloadSupplementary]
